# Supplementary material for: A Genome-Wide Association Study to Identify Novel Candidate Genes Related to Low-Nitrogen Tolerance in Cucumber (Cucumis sativus L.)
Source: MDPI journal article supplement (doi:10.3390/genes14030662), 2023-03-06
Supplement: s1 [file s1]

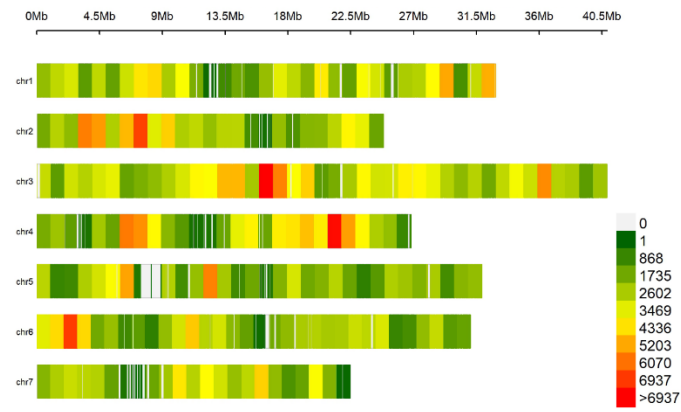

Figure S1. The number of SNPs within 1Mb Window size

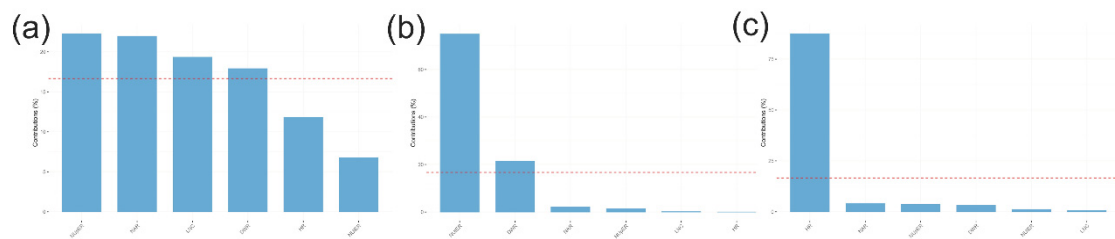

Figure S2. Principal component analysis of phenotypic data

(a) - (b) significant phenotypes in Dim1-3,

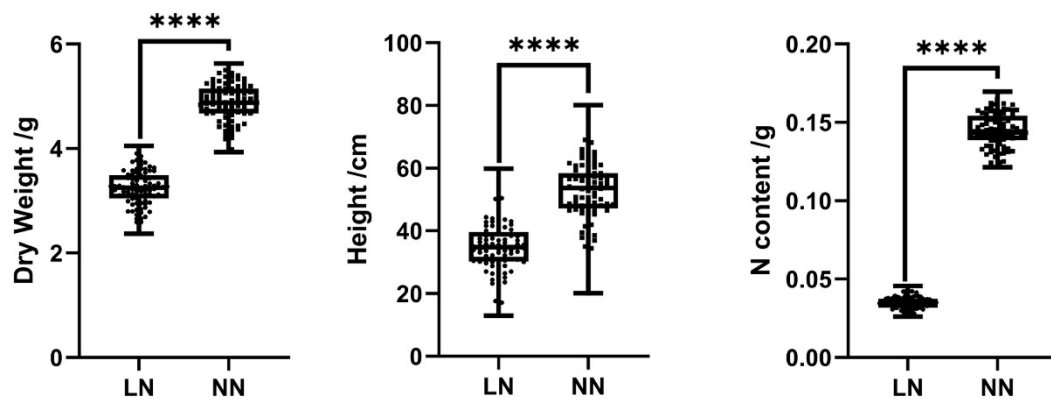

Figure S3. Dry Weight, Height and N content of cucumbers under different treatment. \*\*\*\* indicate significance at  $p < 0.0001$

Table S1. Solution formula

| Nitrogen Content                | Solution A                                                                                  | Solution B                                                                                                                                  |
|---------------------------------|---------------------------------------------------------------------------------------------|---------------------------------------------------------------------------------------------------------------------------------------------|
| Low Nitrogen<br>(3.5mmol/L N)   | Ca (NO <sub>3</sub> ) <sub>2</sub> • 4H <sub>2</sub> O : 413<br>CaCl <sub>2</sub> : 194. 25 | K <sub>2</sub> SO <sub>4</sub> : 522<br>MgSO <sub>4</sub> • 7H <sub>2</sub> O : 492<br>NH <sub>4</sub> H <sub>2</sub> PO <sub>4</sub> : 115 |
| Normal Nitrogen<br>(14mmol/L N) | KNO <sub>3</sub> : 606<br>Ca (NO <sub>3</sub> ) <sub>2</sub> • 4H <sub>2</sub> O : 826      | MgSO <sub>4</sub> • 7H <sub>2</sub> O : 492<br>NH <sub>4</sub> H <sub>2</sub> PO <sub>4</sub> : 115                                         |

Micronutrients should also be added in the concentrations shown below, EDTA·Fe16mg/L, H<sub>3</sub>PO<sub>3</sub> 3mg/L, MnSO<sub>4</sub> 2mg/L, ZnSO<sub>4</sub> 0.22mg/L, CuSO<sub>4</sub> 0.08mg/L, (NH<sub>4</sub>)<sub>6</sub>Mo<sub>7</sub>O<sub>24</sub>•4H<sub>2</sub>O 0.5mg/L

Table S2. SNP distribution in cucumber chromosom

| Chromosome | Length      | Variants | Variants rate |
|------------|-------------|----------|---------------|
| 1          | 32,926,272  | 89,772   | 366           |
| 2          | 24,837,039  | 75,231   | 330           |
| 3          | 40,877,379  | 133,583  | 306           |
| 4          | 26,827,763  | 81,194   | 330           |
| 5          | 31,913,682  | 68,612   | 465           |
| 6          | 31,125,843  | 80,689   | 385           |
| 7          | 22,466,726  | 54,637   | 411           |
| Total      | 210,974,704 | 583,718  | 361           |
